# Supplementary material
Source: PubMed Central journal article supplement (PMC6943829)
Supplement: NIHMS1543694-supplement-1.pdf [file NIHMS1543694-supplement-1.pdf]

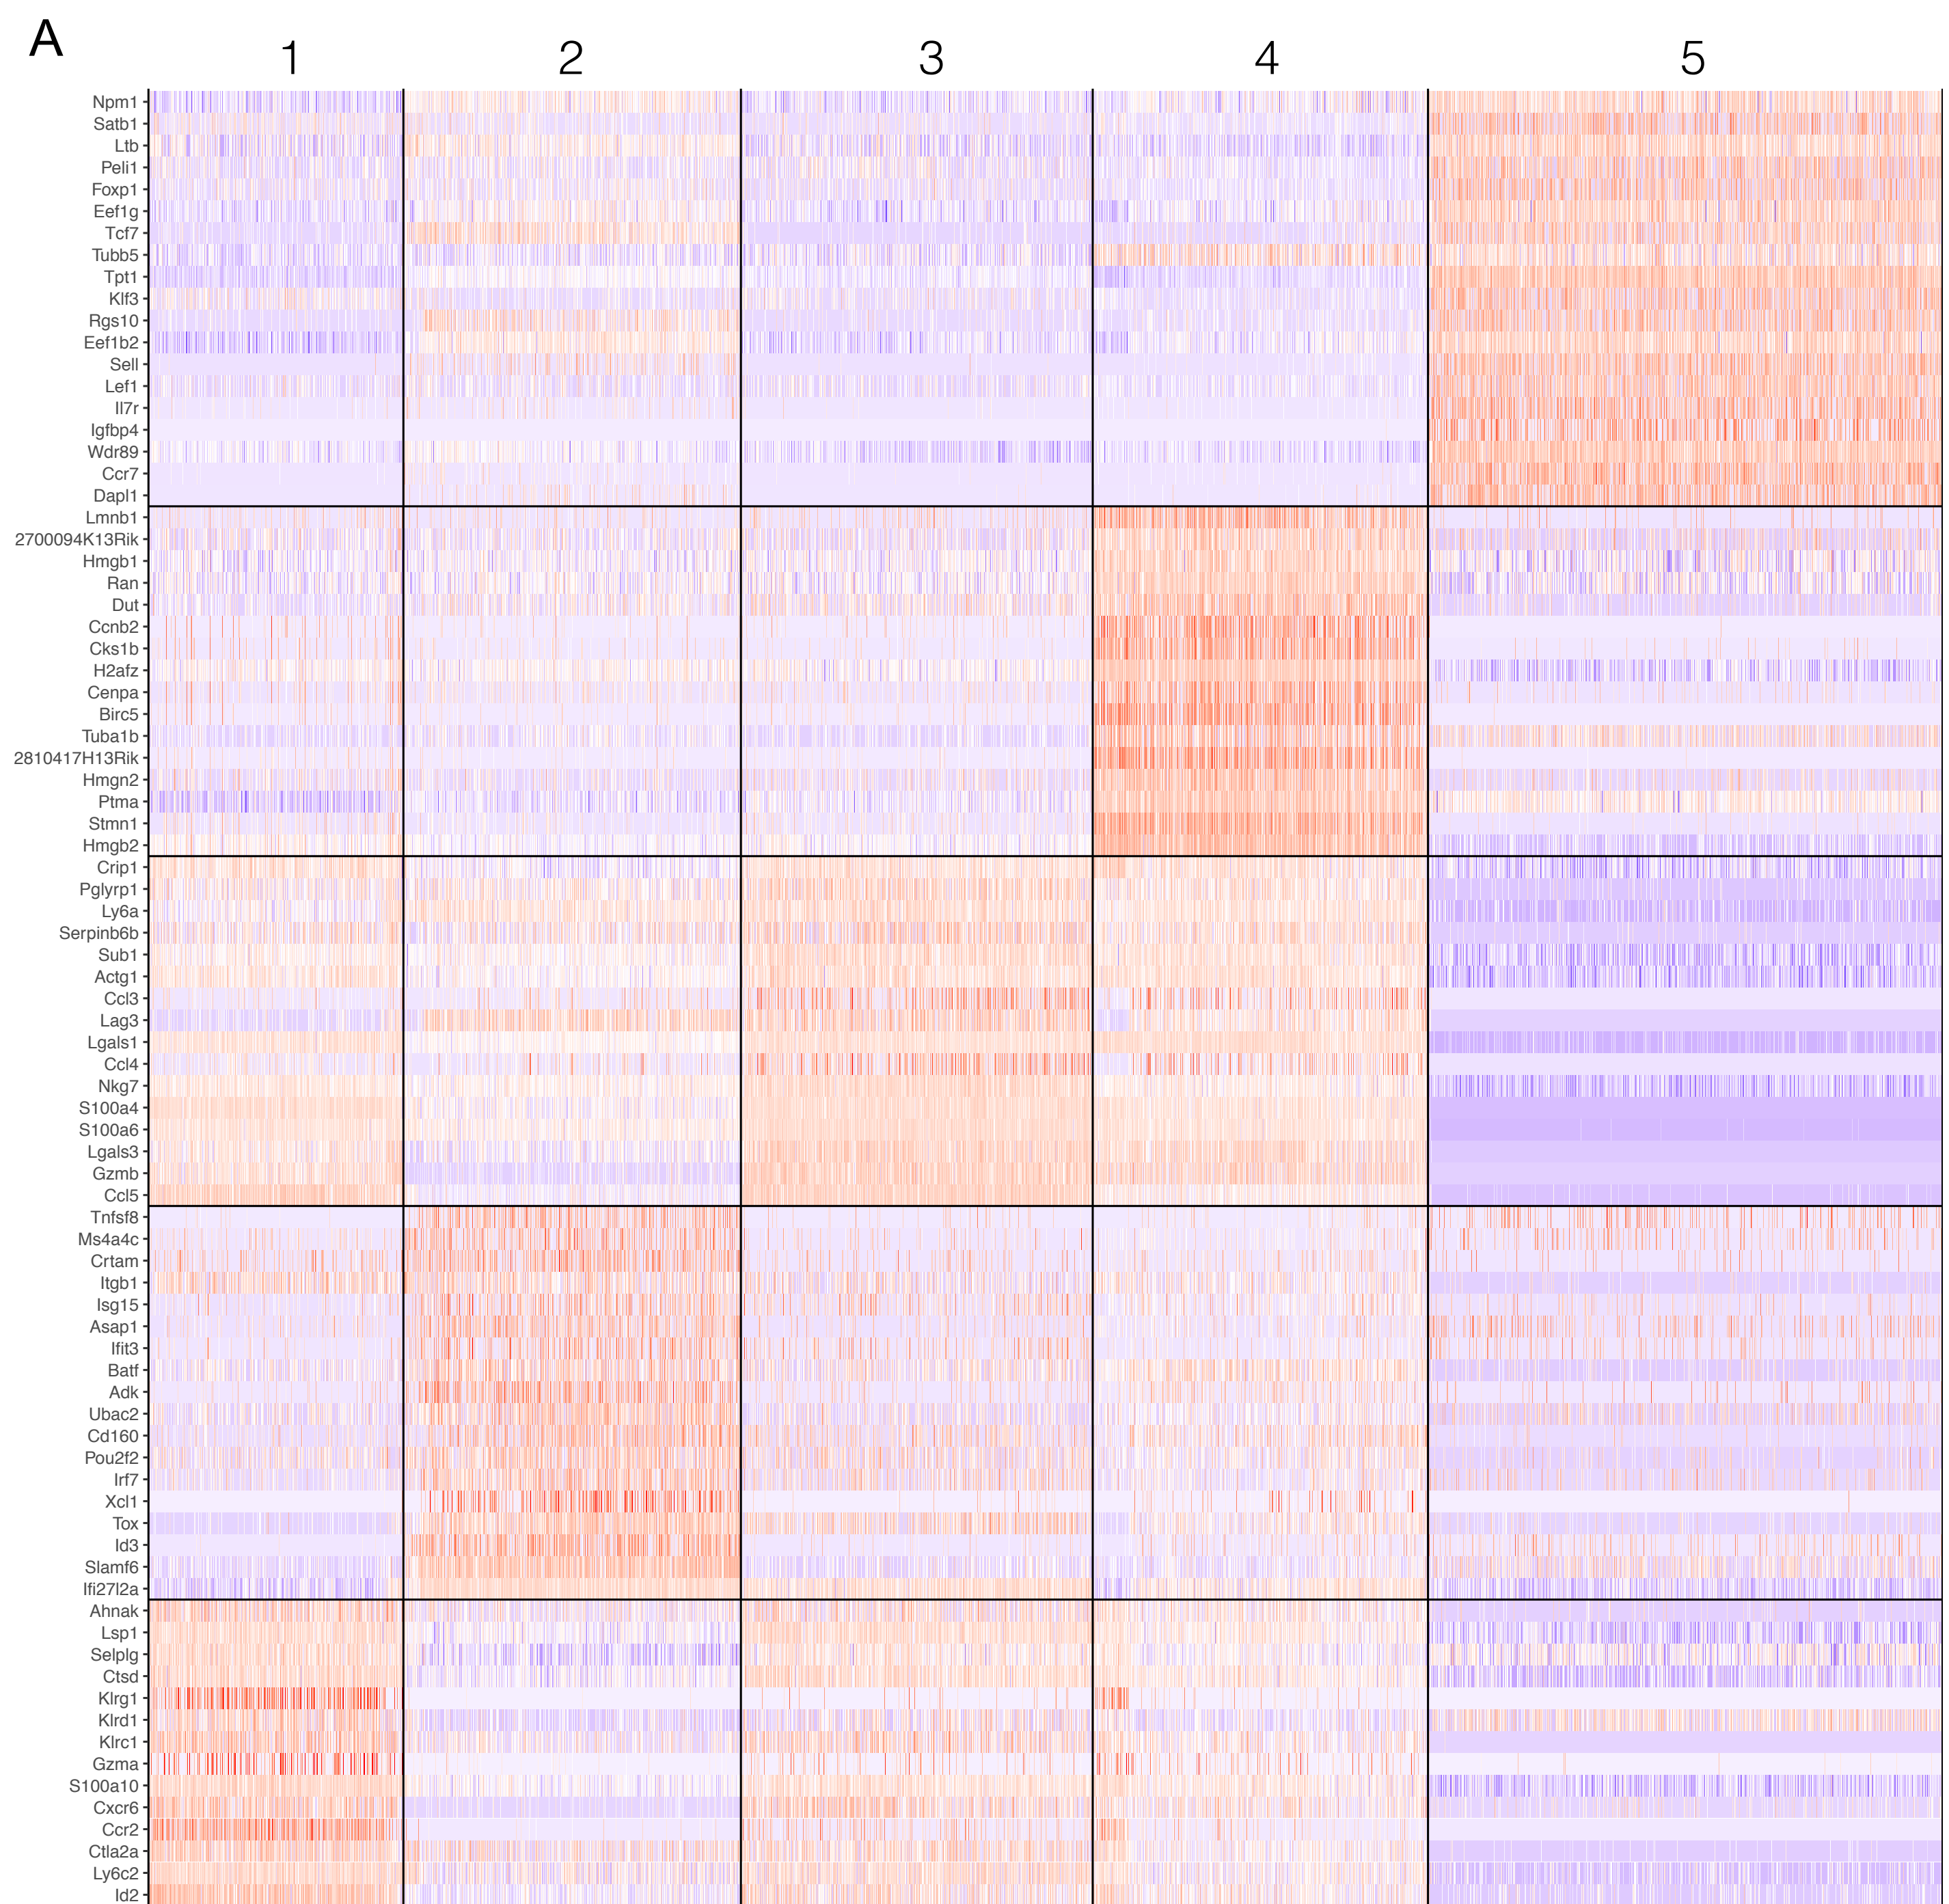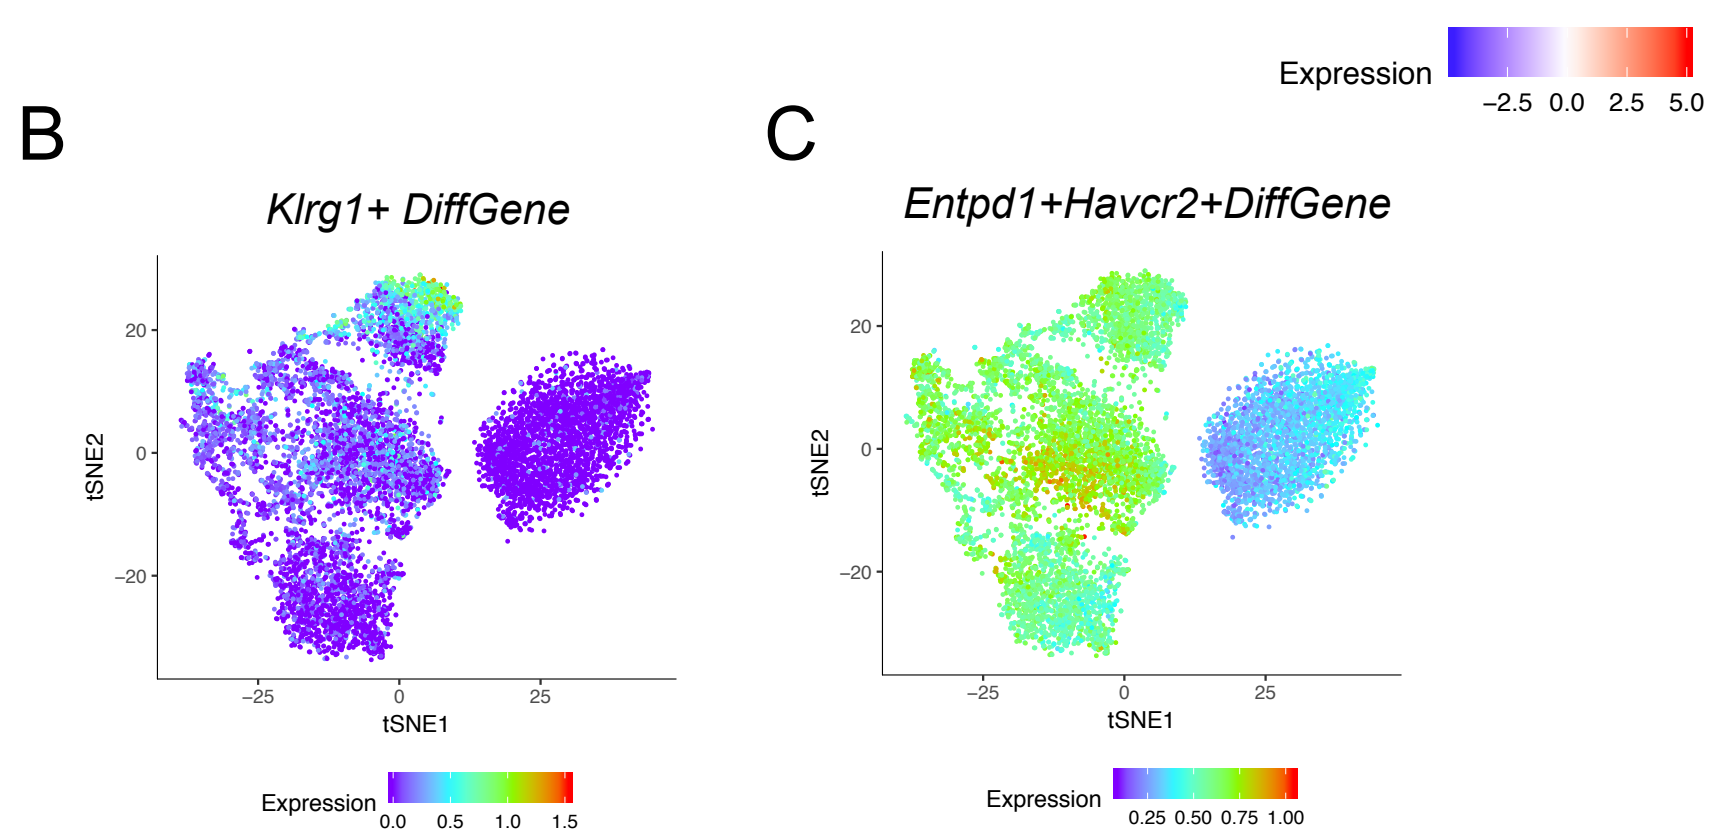

**Figure S1. Significant differentially expressed genes across 5 scRNA-seq clusters.**

A. Heatmap showing top 20 differentially expressed coding genes for the 5 clusters in **Figure 1B**.

B. *Klrg1+ DiffGene* signature in different clusters.

C. *Entpd1+Havcr2+ DiffGene* signature in different clusters.

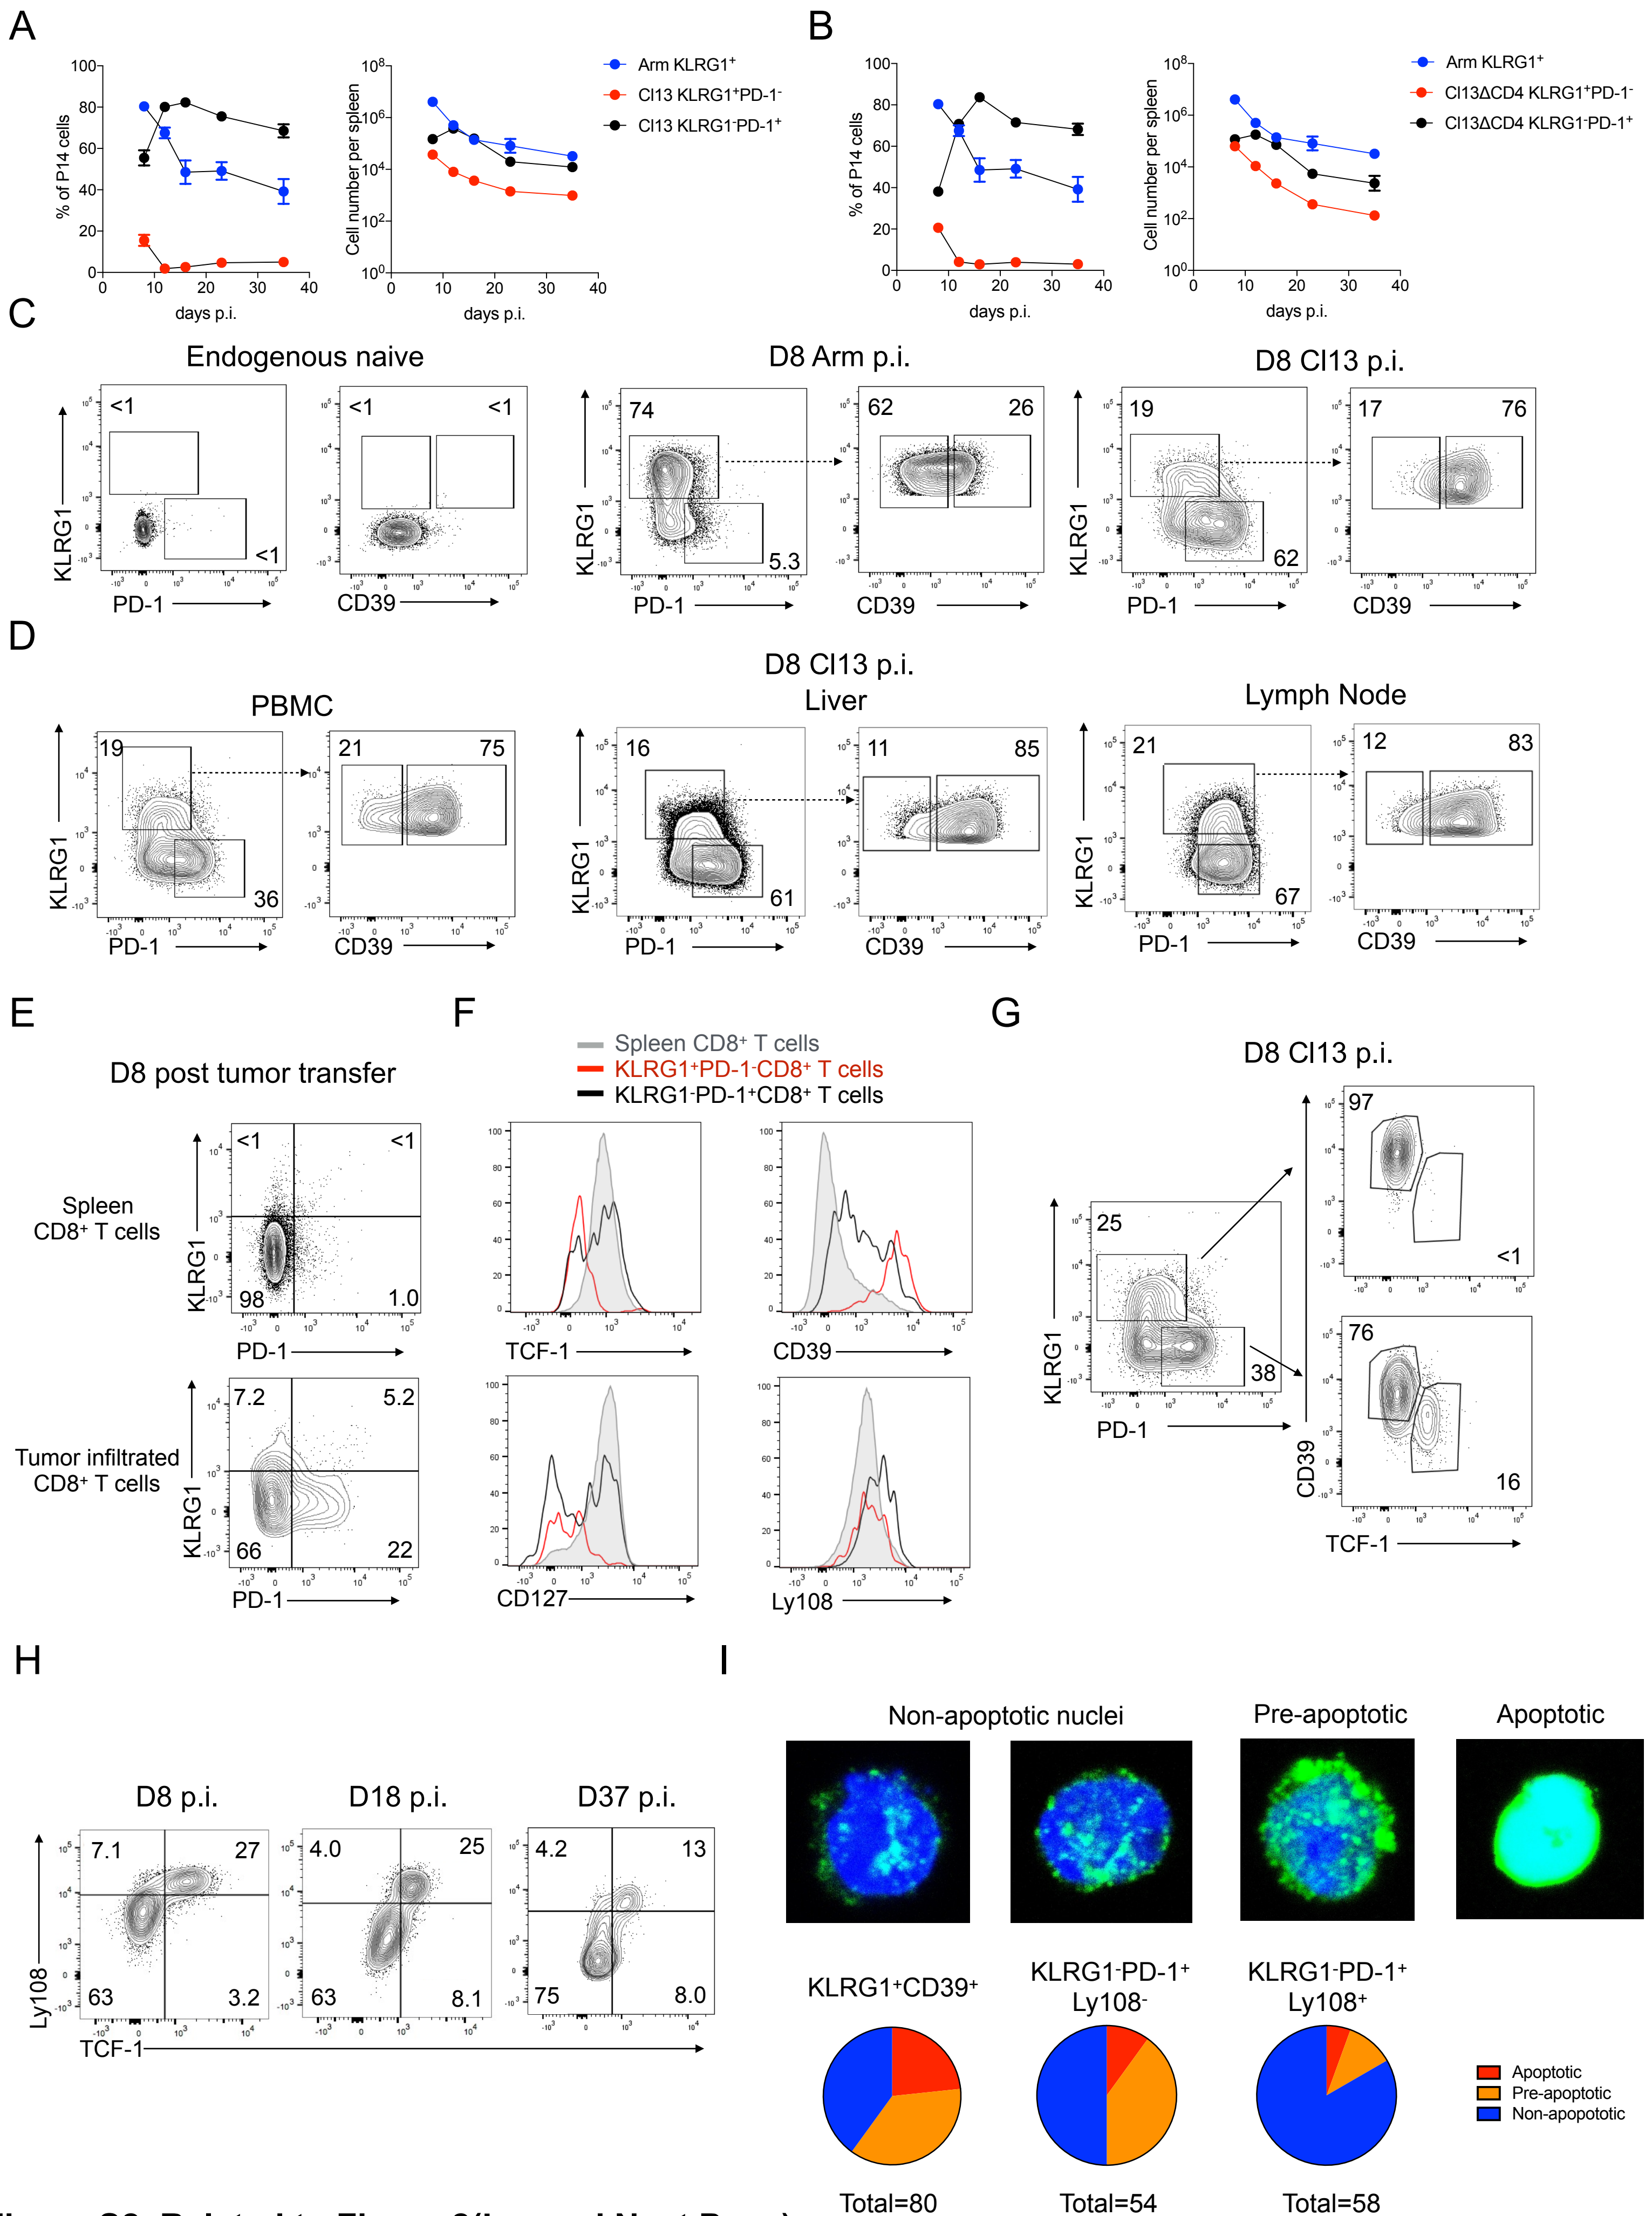

Figure S2, Related to Figure 2(Legend Next Page)



**Figure S2. Population dynamics and molecular signatures of Teff-like and Tex precursor cells.**

- A. Population dynamics of KLRG1<sup>+</sup> P14 cells following LCMV Arm infection and KLRG1<sup>+</sup>PD-1<sup>-</sup> or KLRG1<sup>+</sup>PD-1<sup>+</sup> subsets of responding P14 cells during LCMV CI13 infection.
- B. Similar data as in part (A) for CI13 $\Delta$ CD4 infection. Note, the same LCMV Arm data from part (A) is plotted here for comparison.
- C. KLRG1<sup>+</sup>CD39<sup>+</sup> and KLRG1<sup>+</sup>PD-1<sup>+</sup> P14 cells in spleens on D8 p.i. with Arm or CI13. Gating strategies are based on staining of endogenous naïve cells. Plots are gated on donor P14 cells.
- D. KLRG1 versus PD-1 as well as CD39 expression in KLRG1<sup>+</sup> responding P14 cells in the indicated tissues on D8 p.i. with CI13. KLRG1<sup>+</sup> gate was based on staining of P14 cells in Arm infection and CD39<sup>-</sup> gate was based on staining of endogenous naïve cells.
- E. Gating for KLRG1<sup>+</sup>PD-1<sup>-</sup> and KLRG1<sup>+</sup>PD-1<sup>+</sup> populations in the tumor infiltrating CD8 T cells (TILs) of CT26 tumor. Splenic CD8 T cells are shown as the gating control.
- F. Phenotypic analysis of KLRG1<sup>+</sup>PD-1<sup>-</sup> (red) and KLRG1<sup>+</sup>PD-1<sup>+</sup> (black) TILs versus spleen CD8 T cells (green) on D8 post CT26 tumor inoculation. Representative KLRG1 versus PD-1 expression on TIL is shown in S2E.
- G. Gating for KLRG1<sup>+</sup>CD39<sup>+</sup>TCF-1<sup>-</sup>, KLRG1<sup>+</sup>PD-1<sup>+</sup>TCF-1<sup>-</sup> and KLRG1<sup>+</sup>PD-1<sup>+</sup>TCF-1<sup>+</sup> responding P14 cells at D8 p.i. with CI13. The PD-1 versus KLRG1 gate was based on staining of endogenous CD44<sup>-</sup> naïve CD8 T cells.
- H. Flow cytometry plots for co-expression of TCF-1 and Ly108 during CI13 infection. The Ly108 versus TCF-1 gate was based on staining of endogenous CD8 T cells at each time point. Plots are gated on donor P14 cells.
- I. Imaging of nuclear  $\gamma$ H2AX staining. KLRG1<sup>+</sup>CD39<sup>+</sup>, KLRG1<sup>+</sup>PD-1<sup>+</sup>Ly108<sup>-</sup> and KLRG1<sup>+</sup>PD-1<sup>+</sup>Ly108<sup>+</sup> P14 CD8 T cells were sorted at D8 p.i. with CI13 and stained with DAPI and for  $\gamma$ H2AX.
- Data are representative of 2-3 independent experiments with at least 3 mice/group.

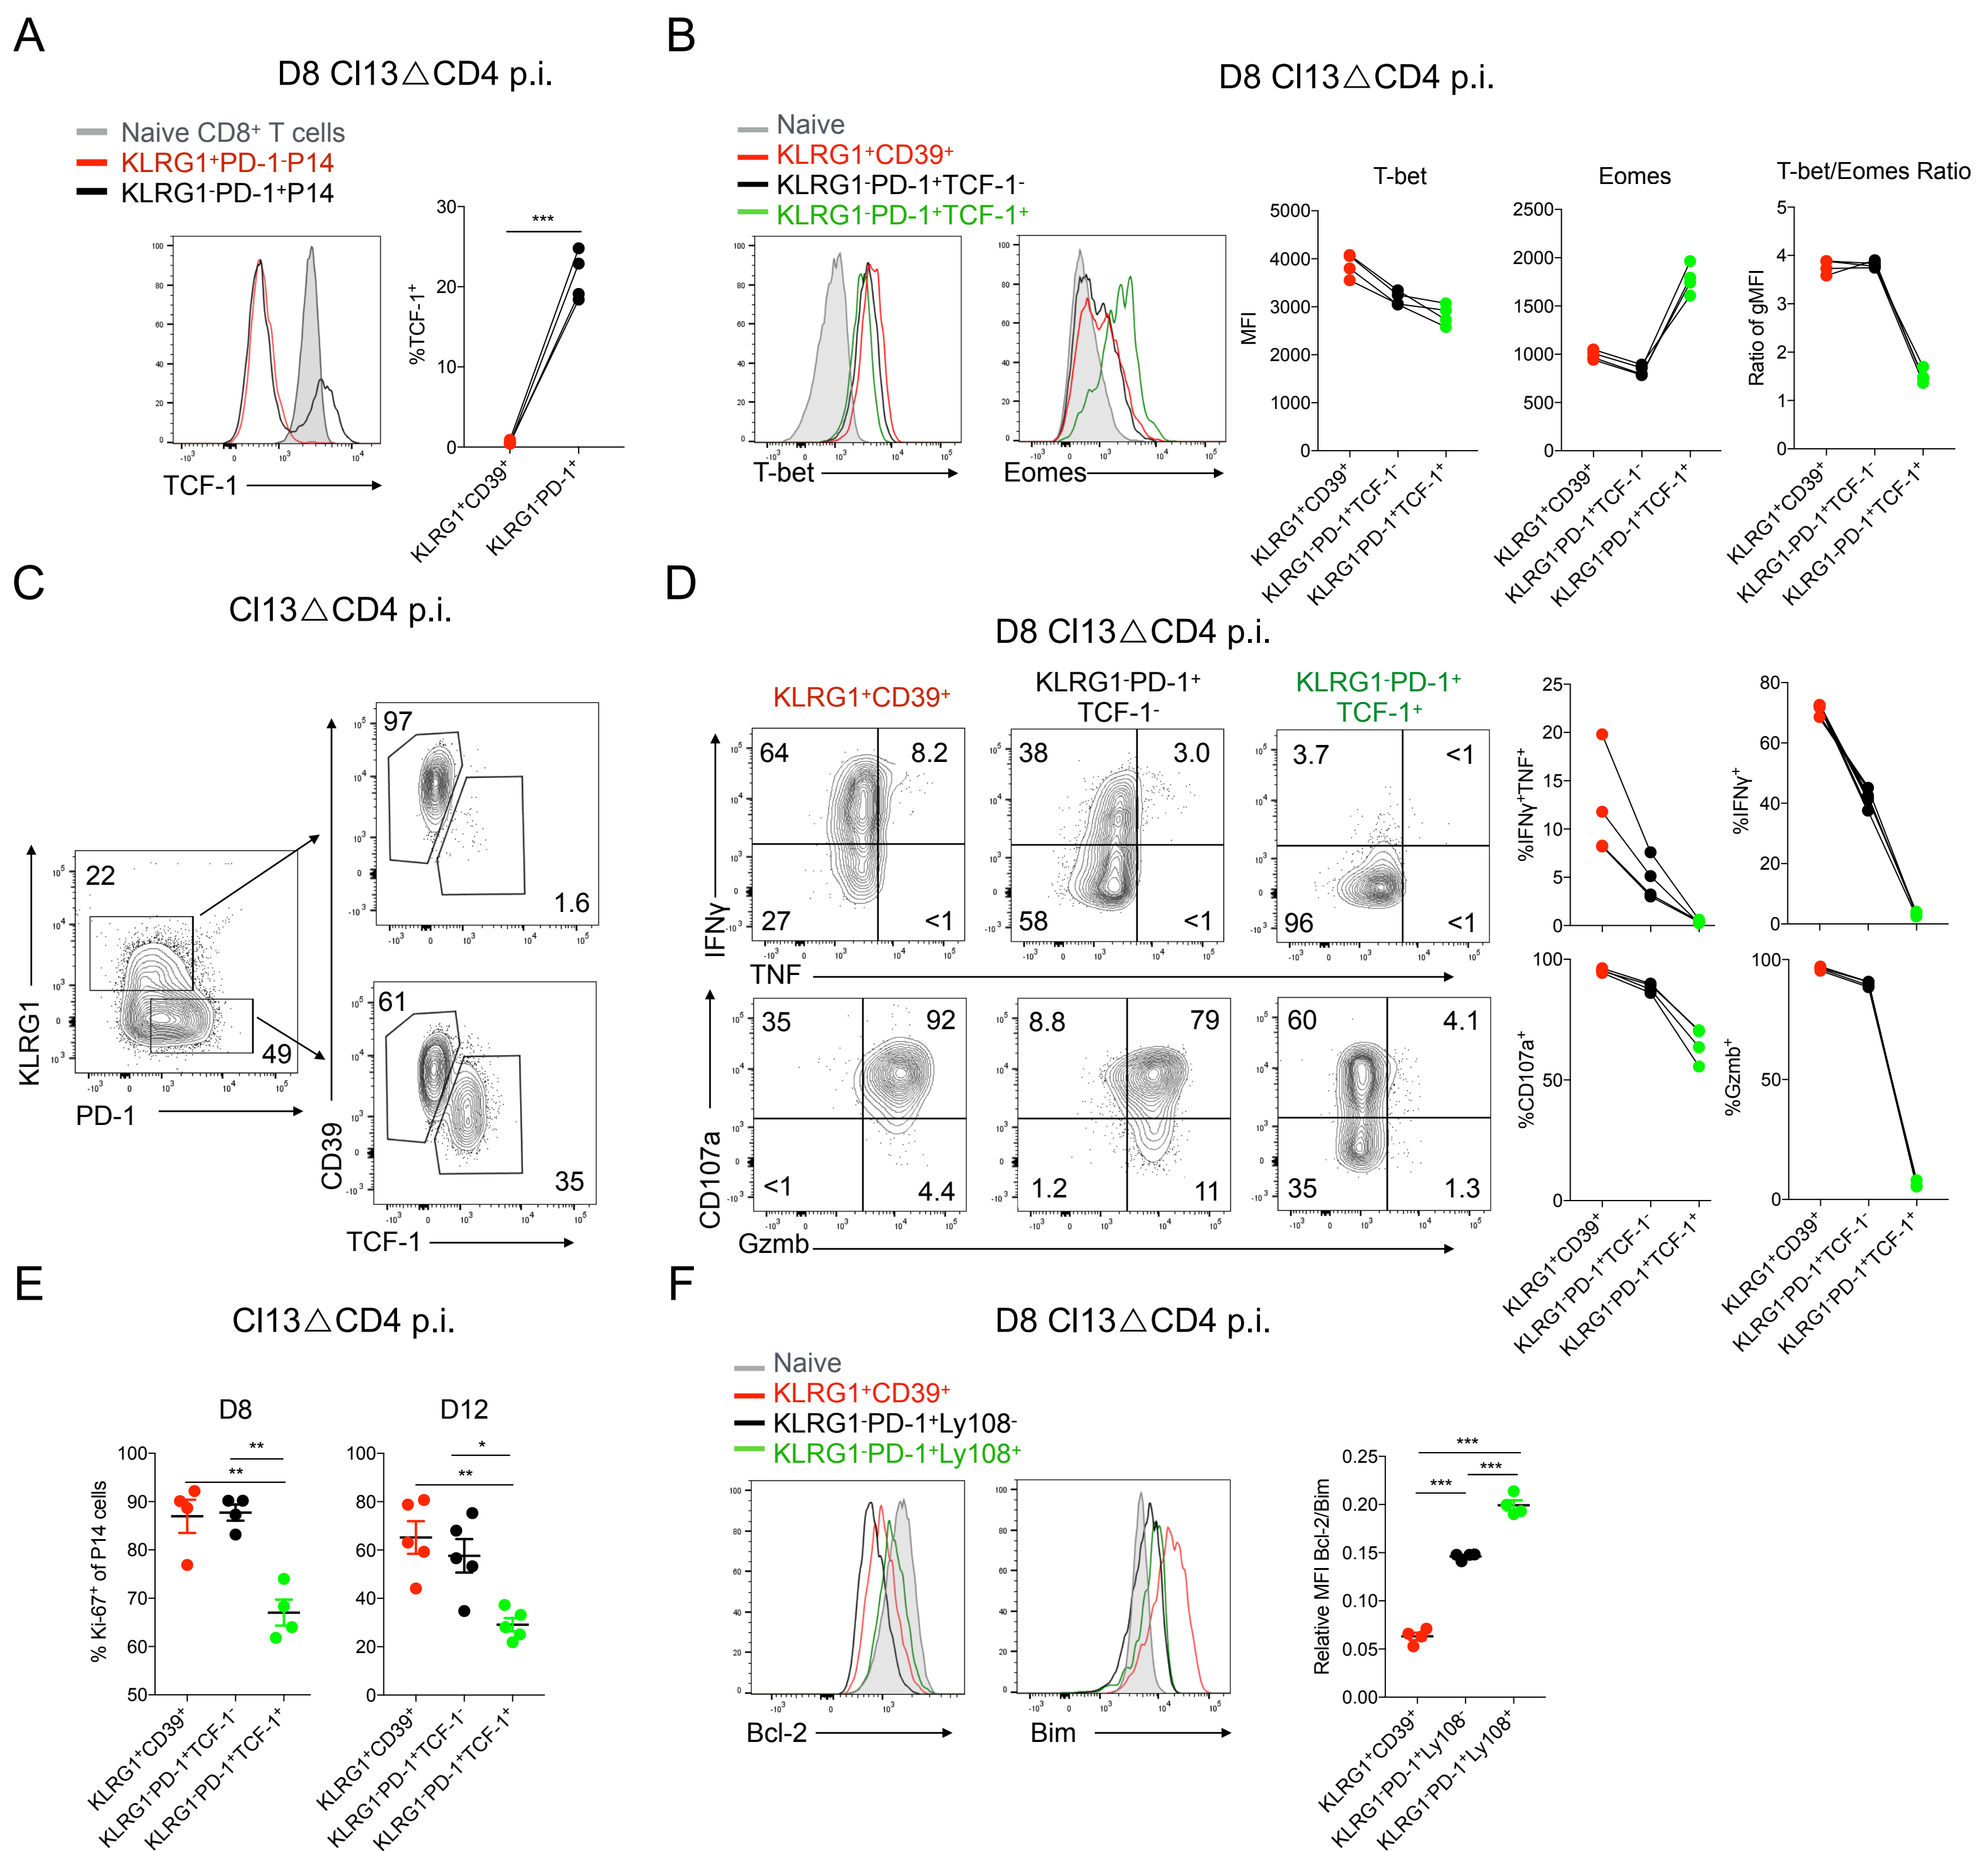

**Figure S3. Identification of KLRG1<sup>+</sup>CD39<sup>+</sup> Teff-like and PD-1<sup>+</sup>TCF-1<sup>+</sup> Tex precursor cells in the absence of CD4 help.**

A. TCF-1 expression in KLRG1<sup>+</sup>CD39<sup>+</sup> and KLRG1-PD-1<sup>+</sup> P14 cells at D8 of CI13 $\Delta$ CD4 infection. TCF-1 expression in endogenous naïve CD62L<sup>+</sup>CD44<sup>-</sup>CD8 T cells is shown as a control.

B. T-bet and Eomes expression in KLRG1<sup>+</sup>CD39<sup>+</sup> and KLRG1-PD-1<sup>+</sup> P14 cells at D8 of CI13 $\Delta$ CD4 infection. Naïve CD62L<sup>+</sup>CD44<sup>-</sup>CD8 T cells were again used as a control. T-bet/Eomes ratio was calculated based on geometric MFI.

C. Gating for KLRG1<sup>+</sup>CD39<sup>+</sup>TCF-1<sup>-</sup>, KLRG1-PD-1<sup>+</sup>TCF-1<sup>-</sup> and KLRG1-PD-1<sup>+</sup>TCF-1<sup>+</sup> responding P14 cells at D8 of CI13 $\Delta$ CD4 infection. The PD-1 versus KLRG1 gate was based on staining of endogenous CD44<sup>-</sup> naïve CD8 T cells.

D. IFN $\gamma$ , TNF, CD107a and Granzyme B (Gzmb) expression by KLRG1<sup>+</sup>CD39<sup>+</sup> TCF-1<sup>-</sup>, KLRG1-PD-1<sup>+</sup>TCF-1<sup>-</sup> and KLRG1-PD-1<sup>+</sup>TCF-1<sup>+</sup> subsets of responding P14 cells at D8 of CI13 $\Delta$ CD4 infection.

E. The percentage of Ki-67<sup>+</sup> cells in the KLRG1<sup>+</sup>CD39<sup>+</sup>, KLRG1-PD-1<sup>+</sup>TCF-1<sup>-</sup> or KLRG1-PD-1<sup>+</sup>TCF-1<sup>+</sup> subsets of P14 cells was assessed at D8 and D12 of CI13 $\Delta$ CD4 infection.

F. Bcl-2 and Bim expression were assessed at D8 p.i. of CI13 $\Delta$ CD4 infection in the KLRG1<sup>+</sup>CD39<sup>+</sup>, KLRG1-PD-1<sup>+</sup>Ly108<sup>-</sup> and KLRG1-PD-1<sup>+</sup>Ly108<sup>+</sup> subsets of P14 cells. Bcl-2 and Bim expression in naïve CD62L<sup>+</sup>CD44<sup>-</sup>CD8 T cells is shown as a control. The ratio of Bcl-2/Bim was calculated based on geometric MFI.

\* $P < 0.05$ , \*\* $P < 0.01$ , \*\*\* $P < 0.001$  versus control (two-tailed Student's  $t$ -test and one-way Anova). Data are representative of 2 independent experiments with at least 4 mice/group (mean  $\pm$  s.e.m.).

**Figure S3, Related to Figure 2**



**A**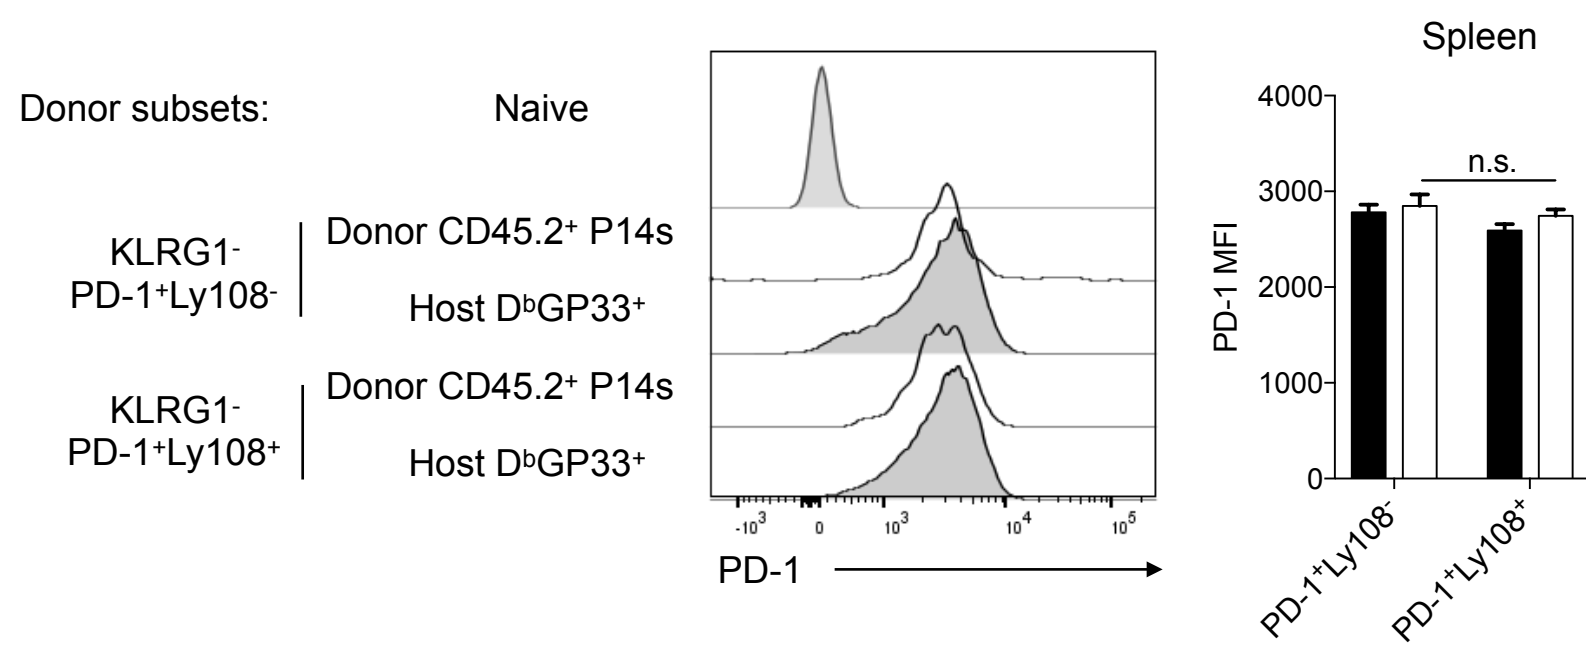**B**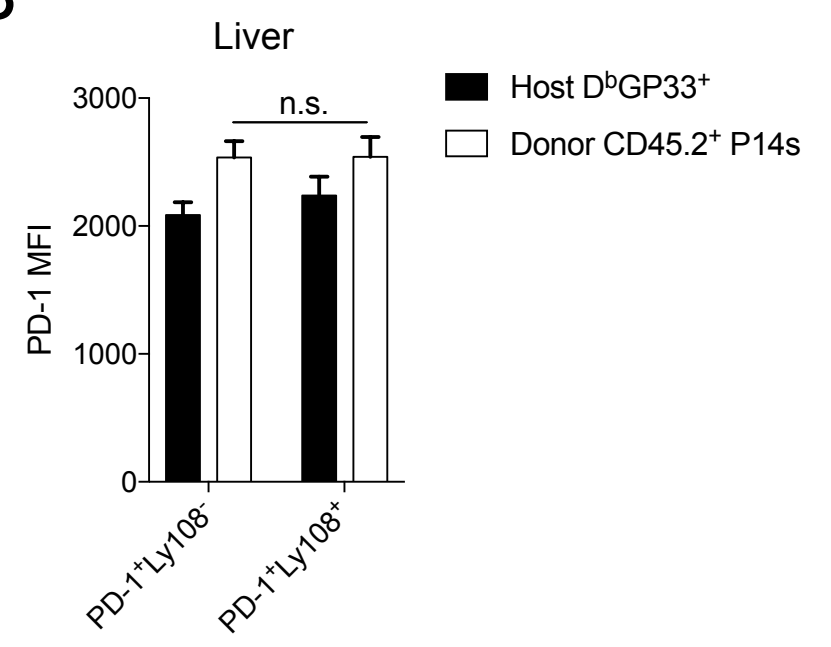**C**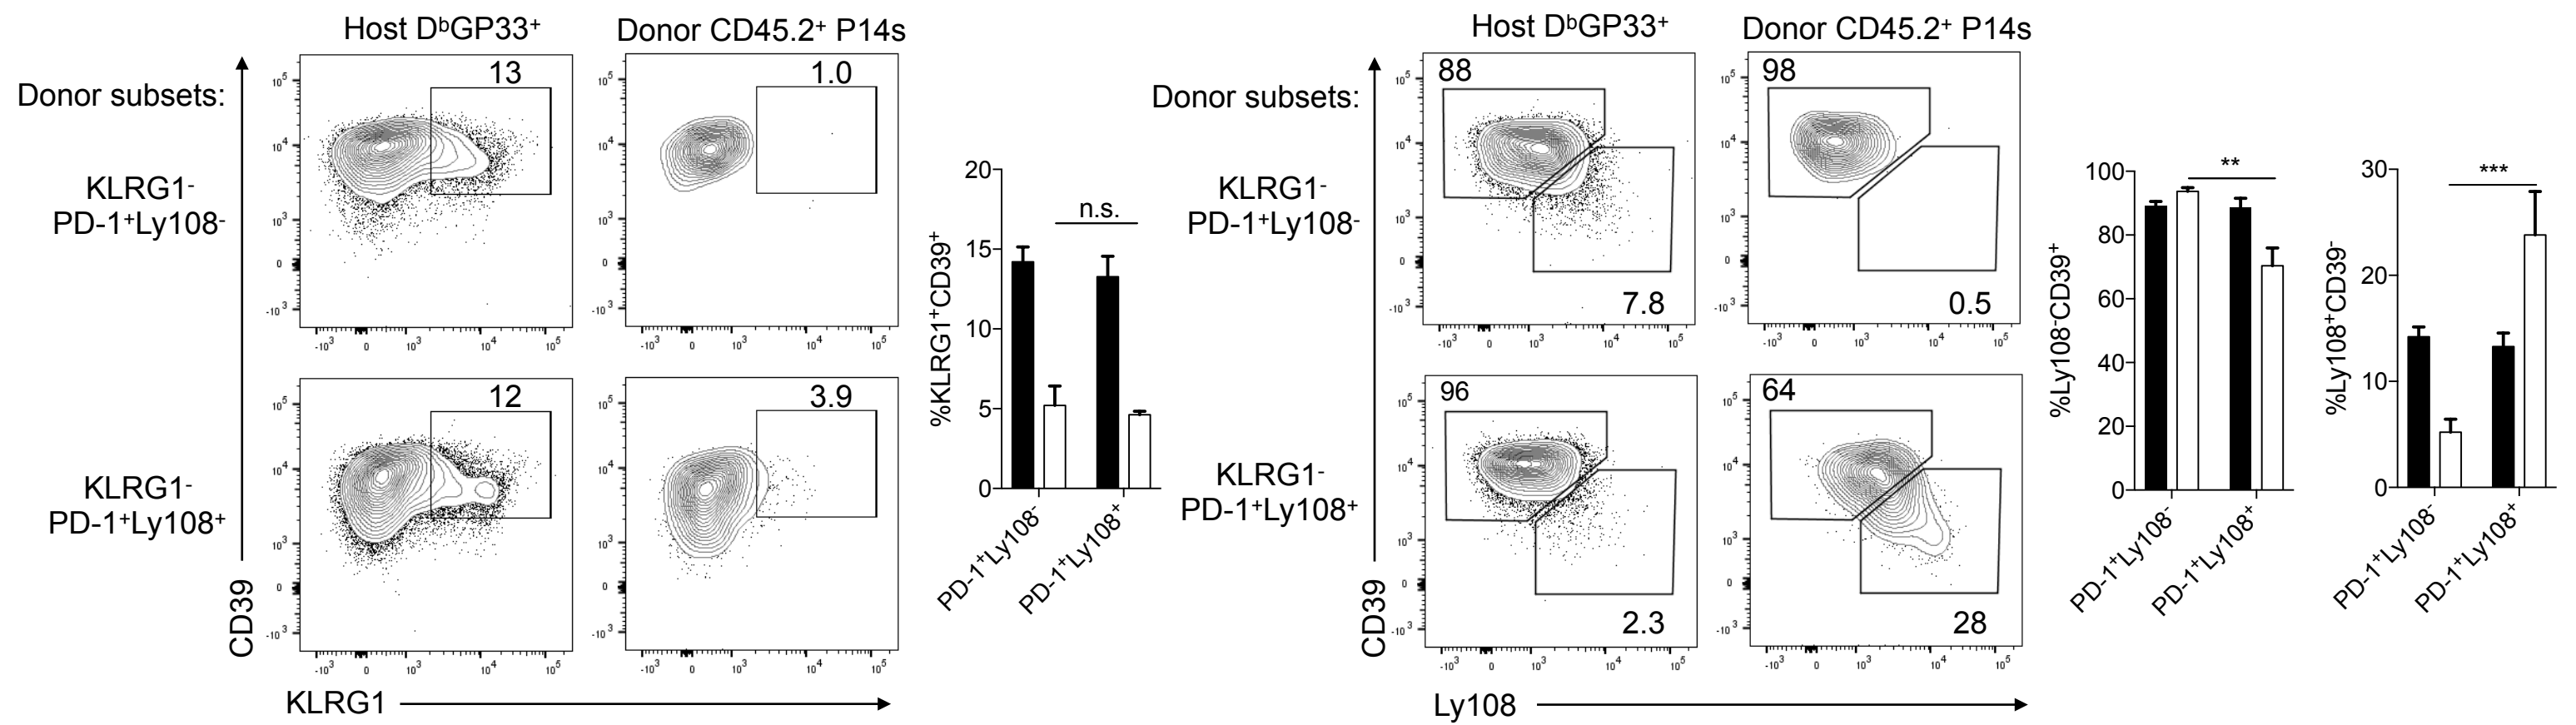**D**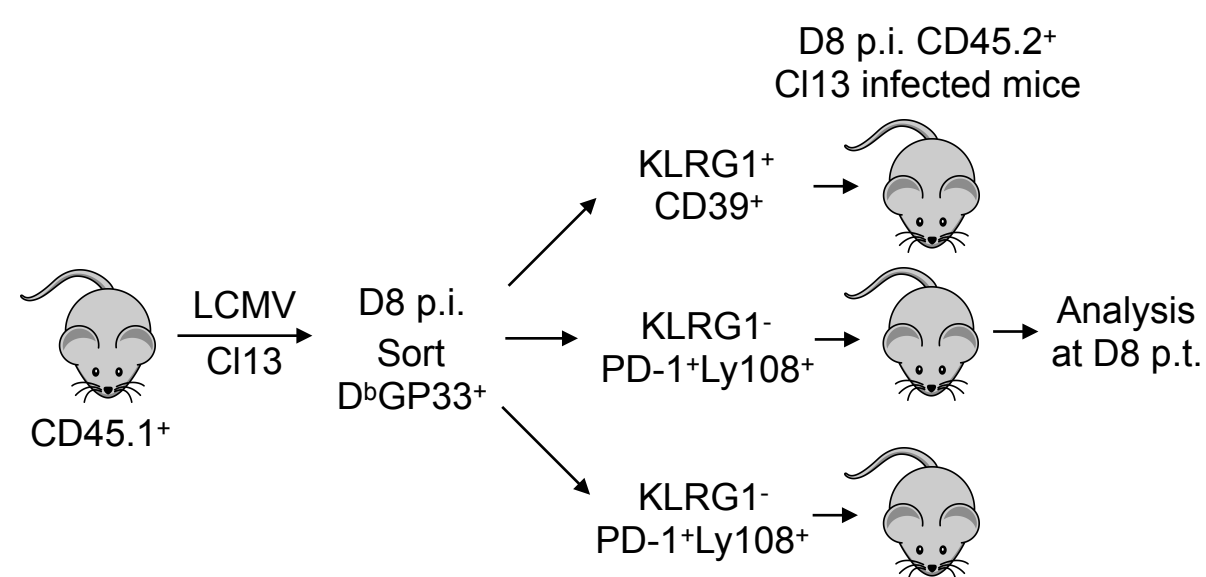**E**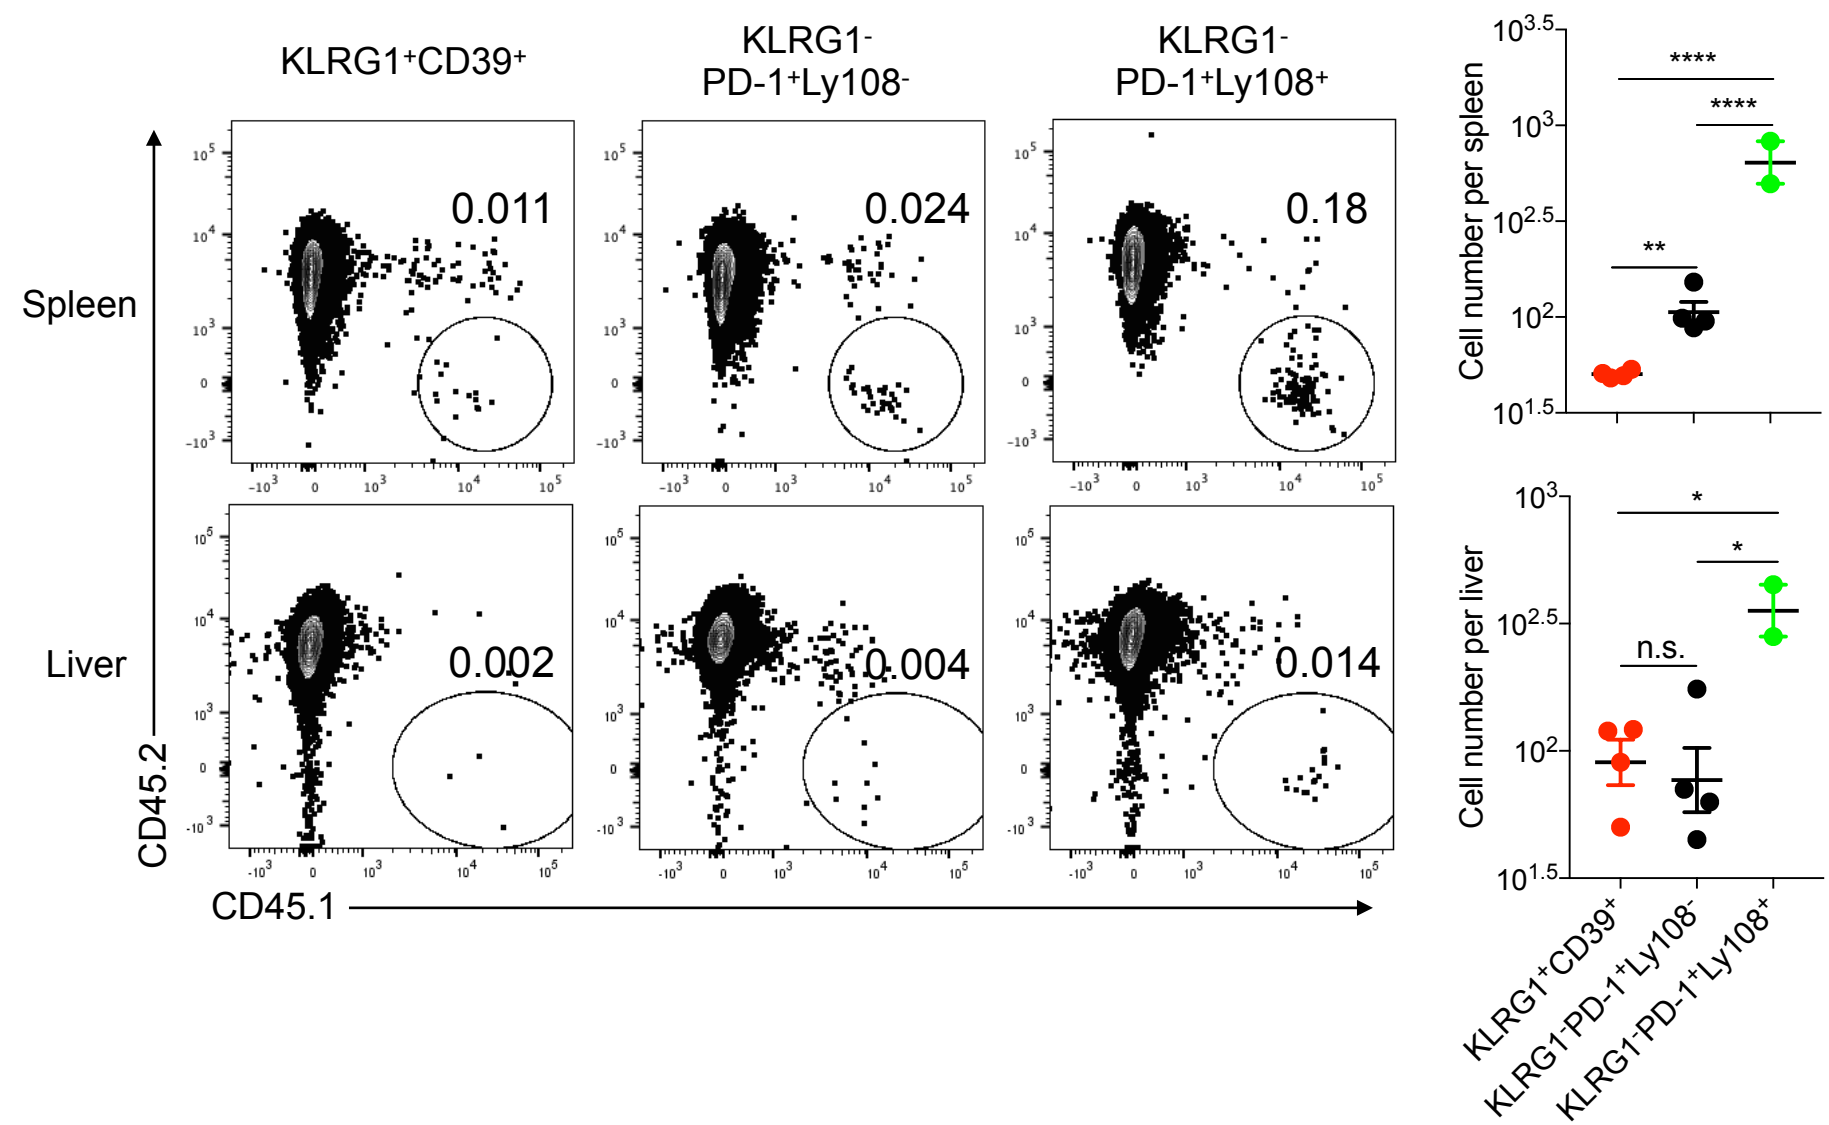**F**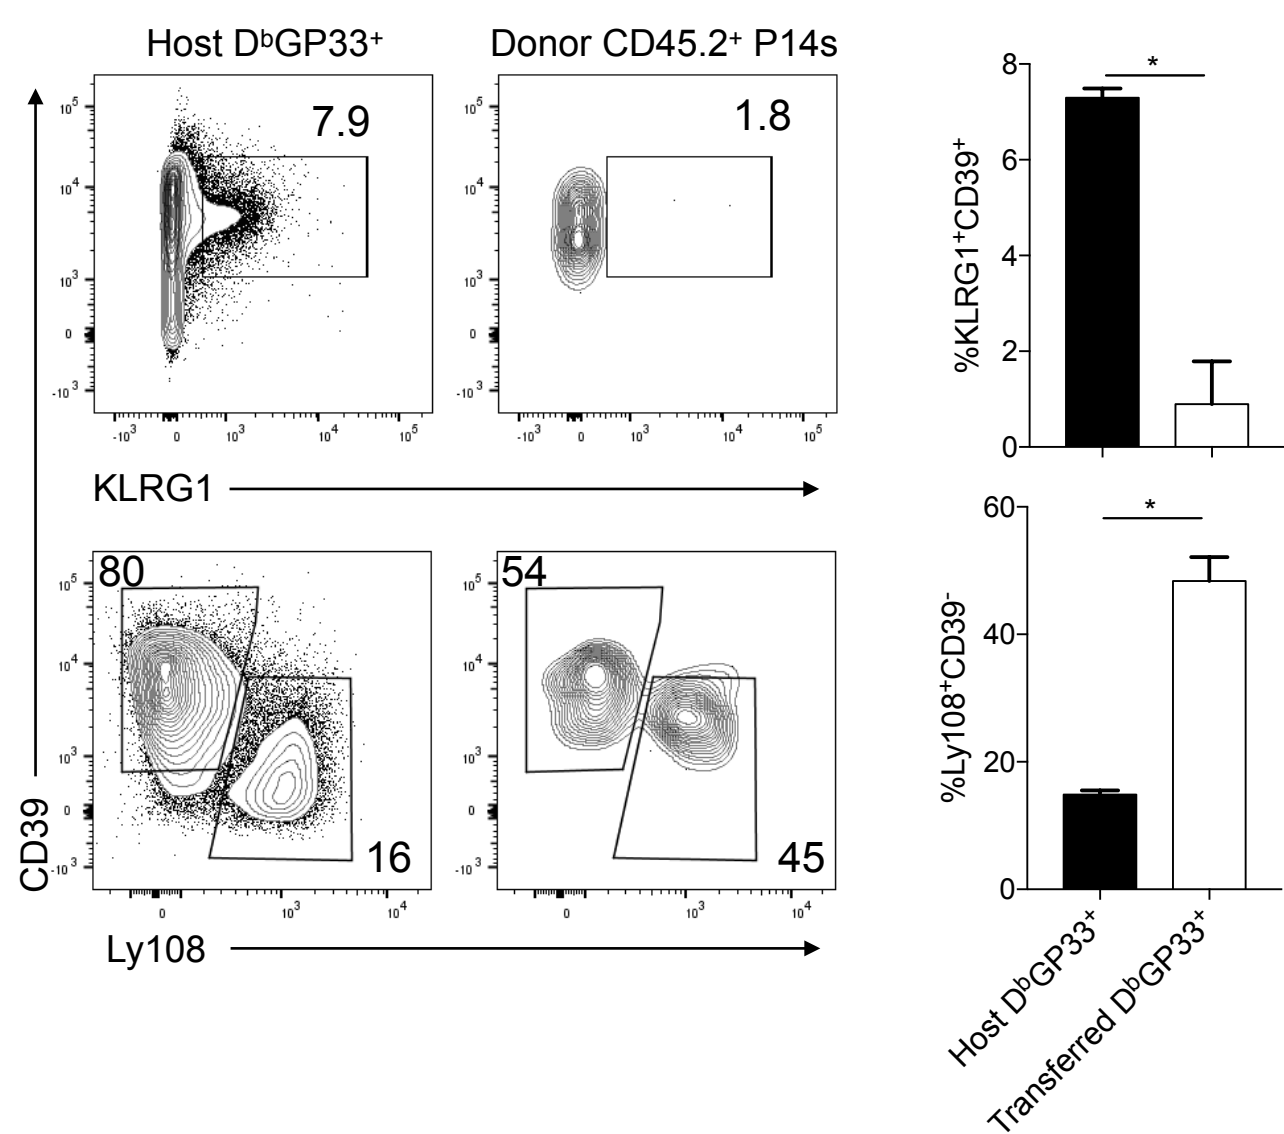

**Figure S4, Related to Figure 3(Legend Next Page)**

**Figure S4. Lineage tracing for KLRG1<sup>+</sup>CD39<sup>+</sup> chronic Teff-like cells, KLRG1<sup>-</sup>PD-1<sup>+</sup>Ly108<sup>-</sup> Tex cells and KLRG1<sup>-</sup>PD-1<sup>+</sup>Ly108<sup>+</sup> Tex precursor cells.**

- A. Expression of PD-1 by CD45.2<sup>+</sup> donor KLRG1<sup>-</sup>PD-1<sup>+</sup>Ly108<sup>-</sup> or KLRG1<sup>-</sup>PD-1<sup>+</sup>Ly108<sup>+</sup> P14 cells in the spleen following adoptive transfer into infection-matched recipient mice. Host D<sup>b</sup>GP33 tetramer<sup>+</sup> cells are shown as a control. Note, KLRG1<sup>+</sup>CD39<sup>+</sup> P14 cells isolated at D7 p.i. did not give rise to sufficient numbers of cells for analysis on D8 p.t. (see **Figure 3B**).
- B. Expression of PD-1 by CD45.2<sup>+</sup> donor KLRG1<sup>-</sup>PD-1<sup>+</sup>Ly108<sup>-</sup> or KLRG1<sup>-</sup>PD-1<sup>+</sup>Ly108<sup>+</sup> P14 cells in the liver following adoptive transfer into infection-matched recipient mice similar to part A. Note, KLRG1<sup>+</sup>CD39<sup>+</sup> P14 cells isolated at D7 p.i. did not give rise to sufficient numbers of cells for analysis on D8 p.t. (see **Figure 3B**).
- C. Flow cytometry plots and quantification of CD45.2<sup>+</sup> donor P14 cells and host D<sup>b</sup>GP33 tetramer<sup>+</sup> cells that are KLRG1<sup>+</sup>, Ly108<sup>-</sup>CD39<sup>+</sup>, or Ly108<sup>+</sup>CD39<sup>-</sup> in the liver. Generation of each cell type is quantified for donor KLRG1<sup>-</sup>PD-1<sup>+</sup>Ly108<sup>-</sup> and KLRG1<sup>-</sup>PD-1<sup>+</sup>Ly108<sup>+</sup> subsets. Note, KLRG1<sup>+</sup>CD39<sup>+</sup> P14 cells isolated at D7 p.i. did not give rise to sufficient numbers of cells for analysis on D8 p.t. (see **Figure 3B**).
- D. Experimental design. CD45.1<sup>+</sup> mice were infected with CI13. On D8 p.i. D<sup>b</sup>GP33 tetramer<sup>+</sup> CD8 T cells were sorted for KLRG1<sup>+</sup>CD39<sup>+</sup>, KLRG1<sup>-</sup>PD-1<sup>+</sup>Ly108<sup>-</sup> or KLRG1<sup>-</sup>PD-1<sup>+</sup>Ly108<sup>+</sup> subsets from the spleen. Equal numbers of each subset ( $1.7 \times 10^5$  of each) were then adoptively transferred into infection matched (D8 p.i. CI13) CD45.2<sup>+</sup> recipient mice. Donor cells were analyzed on D8 p.t.
- E. Flow cytometry plots and quantification of donor CD45.1<sup>+</sup>CD8 T cells for the KLRG1<sup>+</sup>CD39<sup>+</sup>, KLRG1<sup>-</sup>PD-1<sup>+</sup>Ly108<sup>-</sup> and KLRG1<sup>-</sup>PD-1<sup>+</sup>Ly108<sup>+</sup> donor groups. Gated on D<sup>b</sup>GP33<sup>+</sup> CD8 T cells.
- F. Flow cytometry plots and quantification of KLRG1<sup>+</sup>CD39<sup>+</sup>, Ly108<sup>-</sup>CD39<sup>+</sup> and Ly108<sup>+</sup>CD39<sup>-</sup> subsets of CD45.1<sup>+</sup>CD8 T cells for the KLRG1<sup>-</sup>PD-1<sup>+</sup>Ly108<sup>+</sup> donor cell group. Endogenous CD45.2<sup>+</sup> D<sup>b</sup>GP33<sup>+</sup> CD8 T cells are used as gating controls.
- \* $P < 0.05$ , \*\* $P < 0.01$ , \*\*\* $P < 0.001$ , \*\*\*\* $P < 0.0001$  versus control (two-tailed Student's *t*-test or One-Way ANOVA). The experiment has at least 2 mice/group (mean $\pm$ s.e.m.).



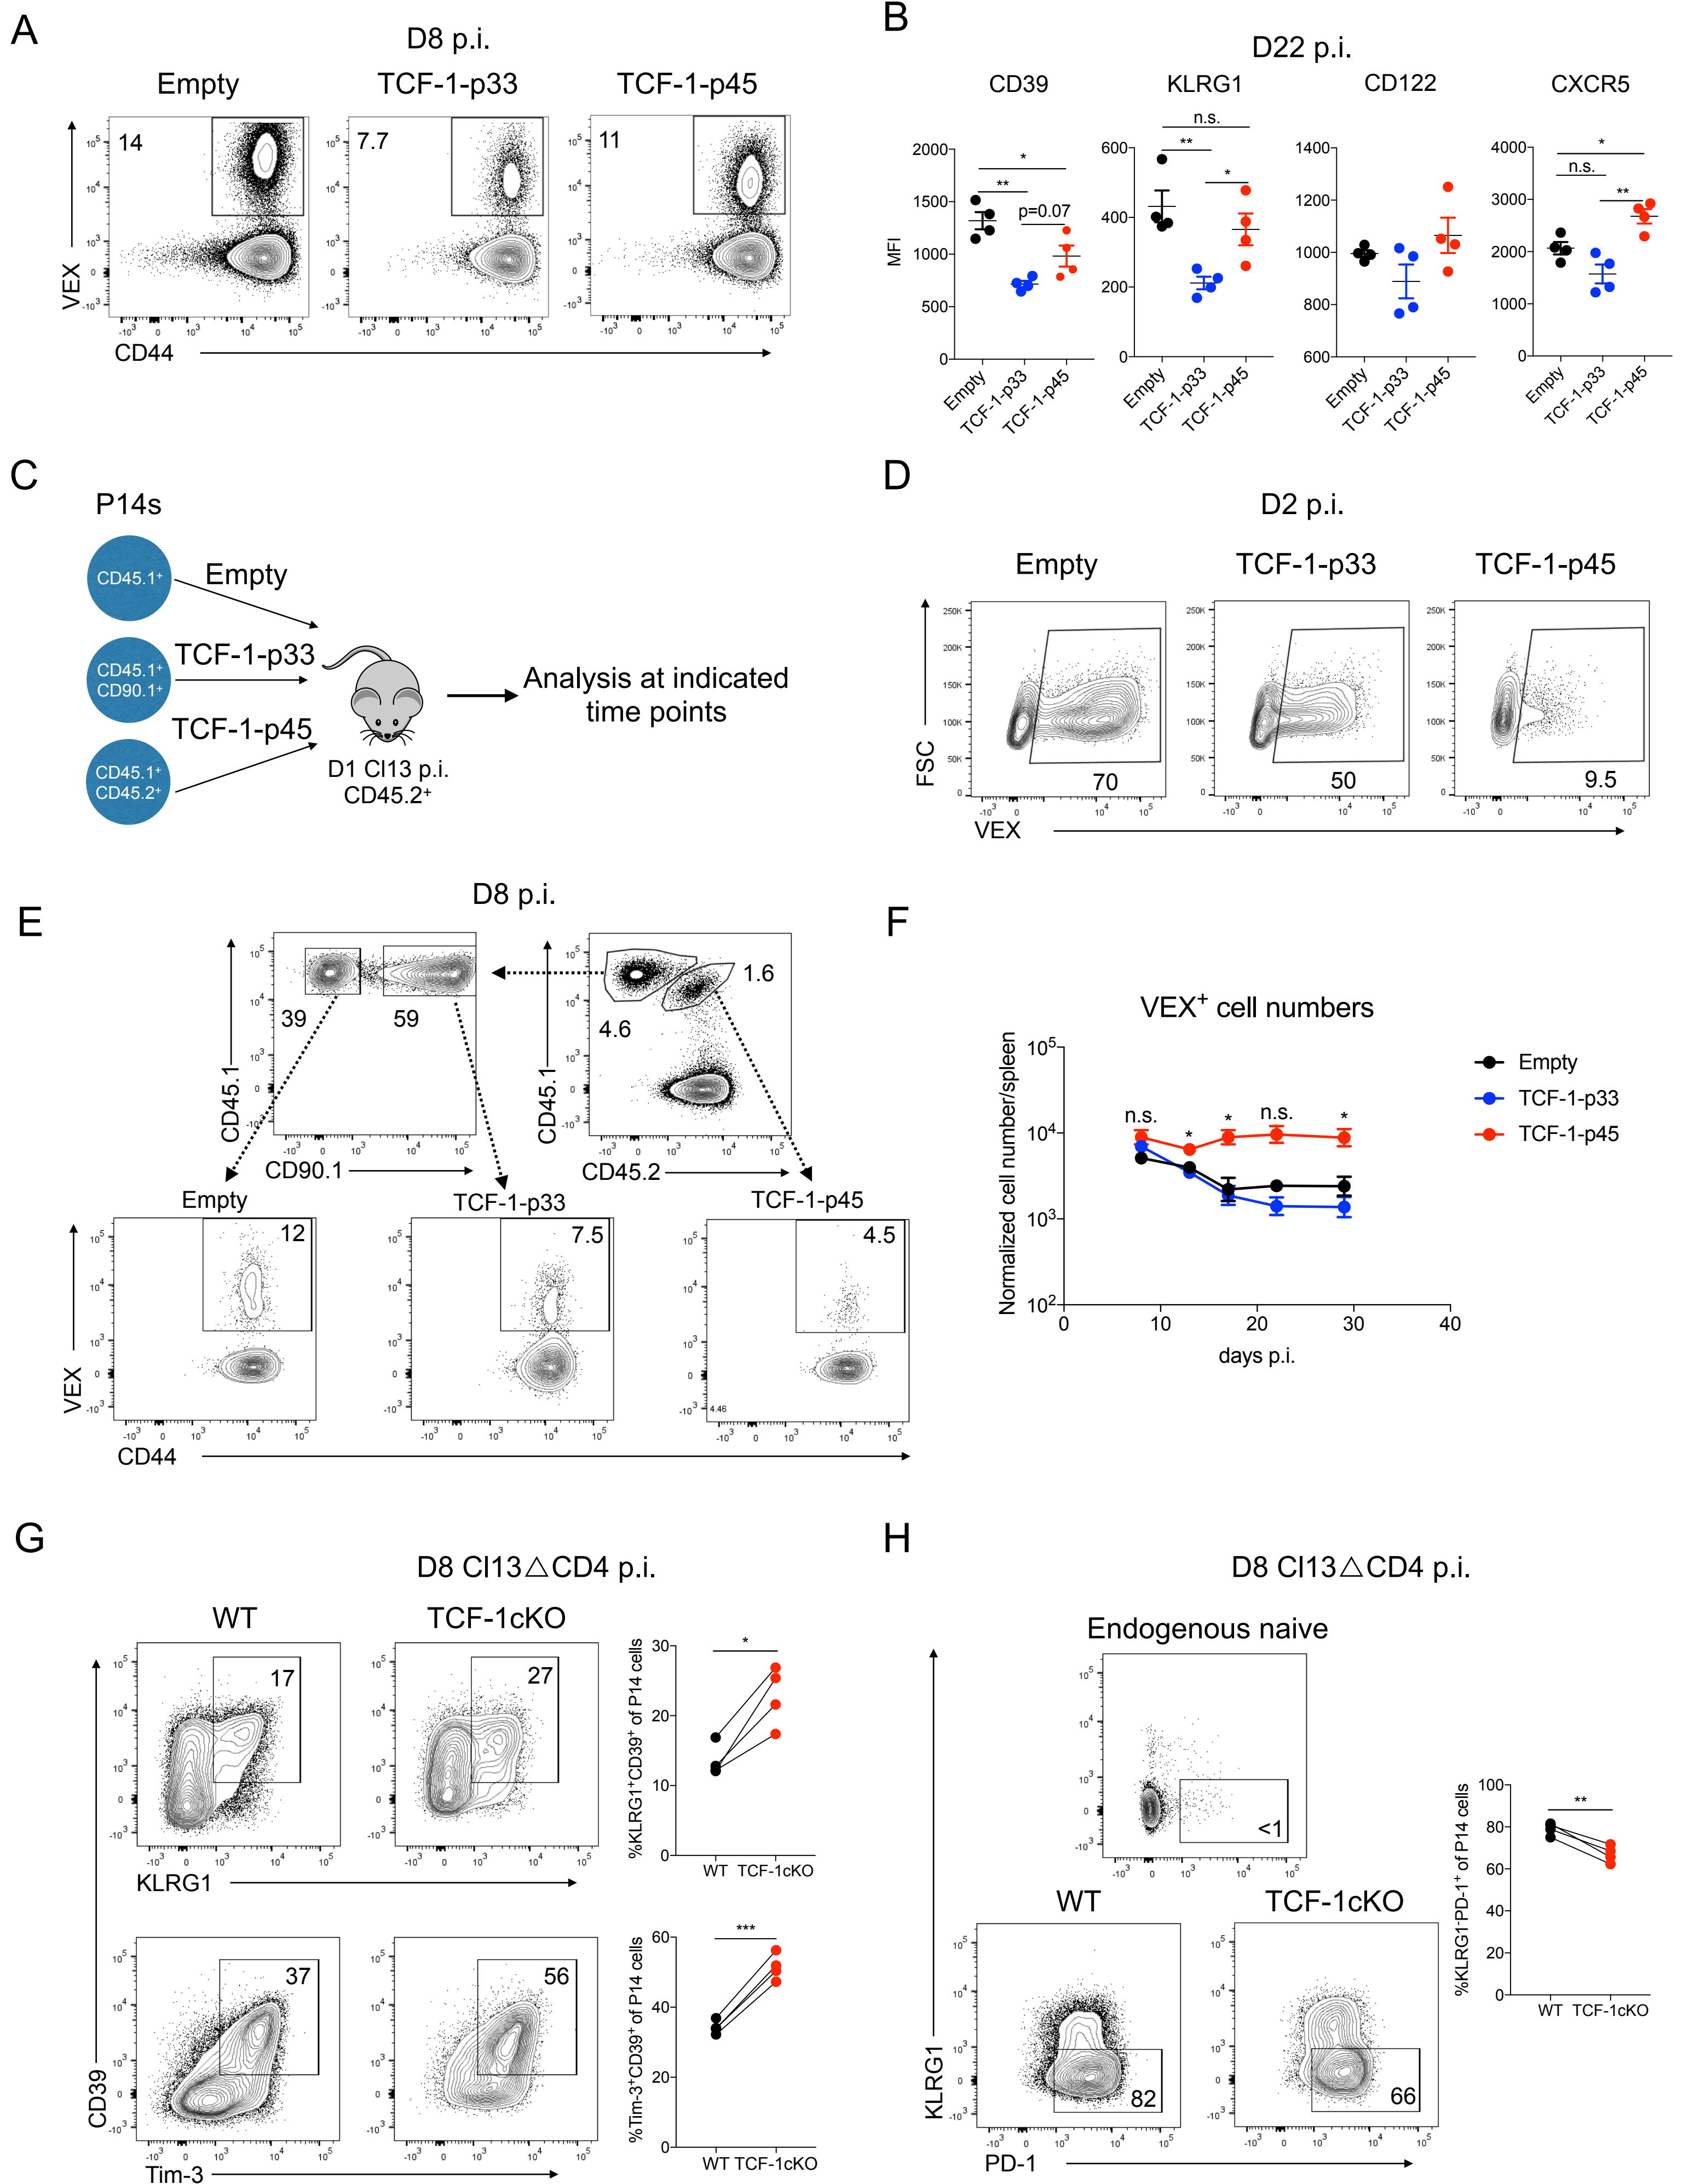

Figure S5, Related to Figure 4(Legend Next Page)

**Figure S5. TCF-1 contributes to the development of Tex cells that persist.**

- A. Flow cytometry plots of P14 cells transduced with empty, TCF-1-p33 or TCF-1-p45 expressing RVs on D8 p.i. with CI13. Gated on P14 cells.
- B. CD39, KLRG1, CD122, CXCR5 expression on VEX<sup>+</sup> P14 cells transduced with Empty, TCF-1-p33 or TCF-1-p45 expressing RVs on D22 p.i. with CI13.
- C. Experimental design. WT P14 cells transduced with the indicated RVs were adoptively transferred to mice infected one day previously with CI13. Donor RV transduced VEX<sup>+</sup> P14 cells were analyzed at the indicated time points.
- D. VEX transduction efficiency on D2 p.i. for Empty-VEX, TCF-1-p33-VEX or TCF-1-p45-VEX RVs.
- E. Gating for empty-VEX (CD45.1<sup>+</sup>CD45.2<sup>-</sup>CD90.1<sup>-</sup>VEX<sup>+</sup>), TCF-1-p33-VEX (CD45.1<sup>+</sup>CD45.2<sup>-</sup>CD90.1<sup>+</sup>VEX<sup>+</sup>) or TCF-1-p45-VEX (CD45.1<sup>+</sup>CD45.2<sup>+</sup>CD90.1<sup>-</sup>VEX<sup>+</sup>) on D8 p.i.
- F. VEX<sup>+</sup> P14 cell numbers were normalized to 1 X 10<sup>4</sup> VEX<sup>+</sup> P14 cell engraftment according to the transduction efficiency on D2 p.i. and analyzed at D8, D12, D16, D22, D30 CI13 p.i.
- G. Flow cytometry plots and quantification of KLRG1<sup>+</sup>CD39<sup>+</sup> and Tim-3<sup>+</sup>CD39<sup>+</sup> subsets of WT and TCF-1cKO responding P14 cells on D8 p.i. with CI13.
- H. Flow cytometry plots and quantification of the KLRG1<sup>+</sup>PD-1<sup>+</sup> subset of WT and TCF-1cKO responding P14 CD8 T cells on D8 p.i. with CI13. The PD-1 versus KLRG1 gate was based on staining of CD44<sup>-</sup> naïve CD8 T cells.
- \**P*<0.05, \*\**P*<0.01, \*\*\**P*<0.001 versus control (One-way Anova or two-tailed Student's *t*-test). Data are representative of 2 independent experiments with at least 4 mice/group (mean±s.e.m.).



A

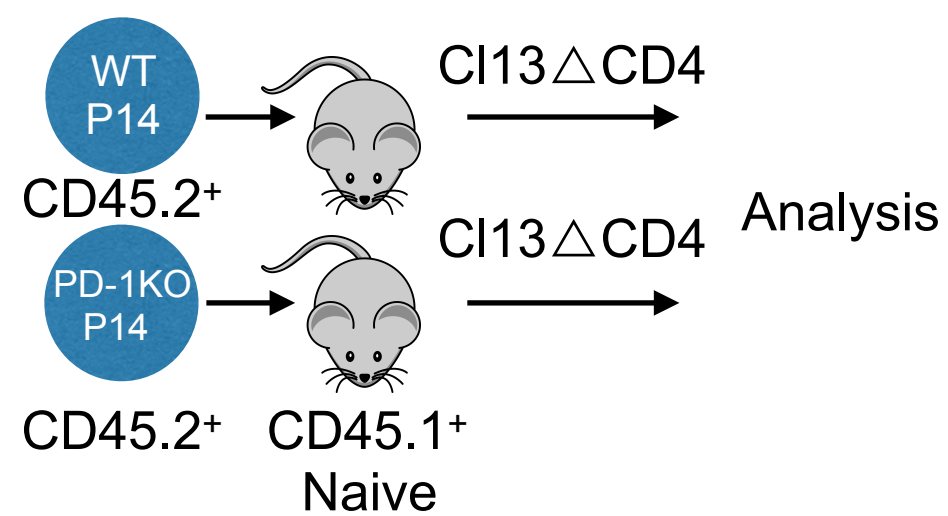

B

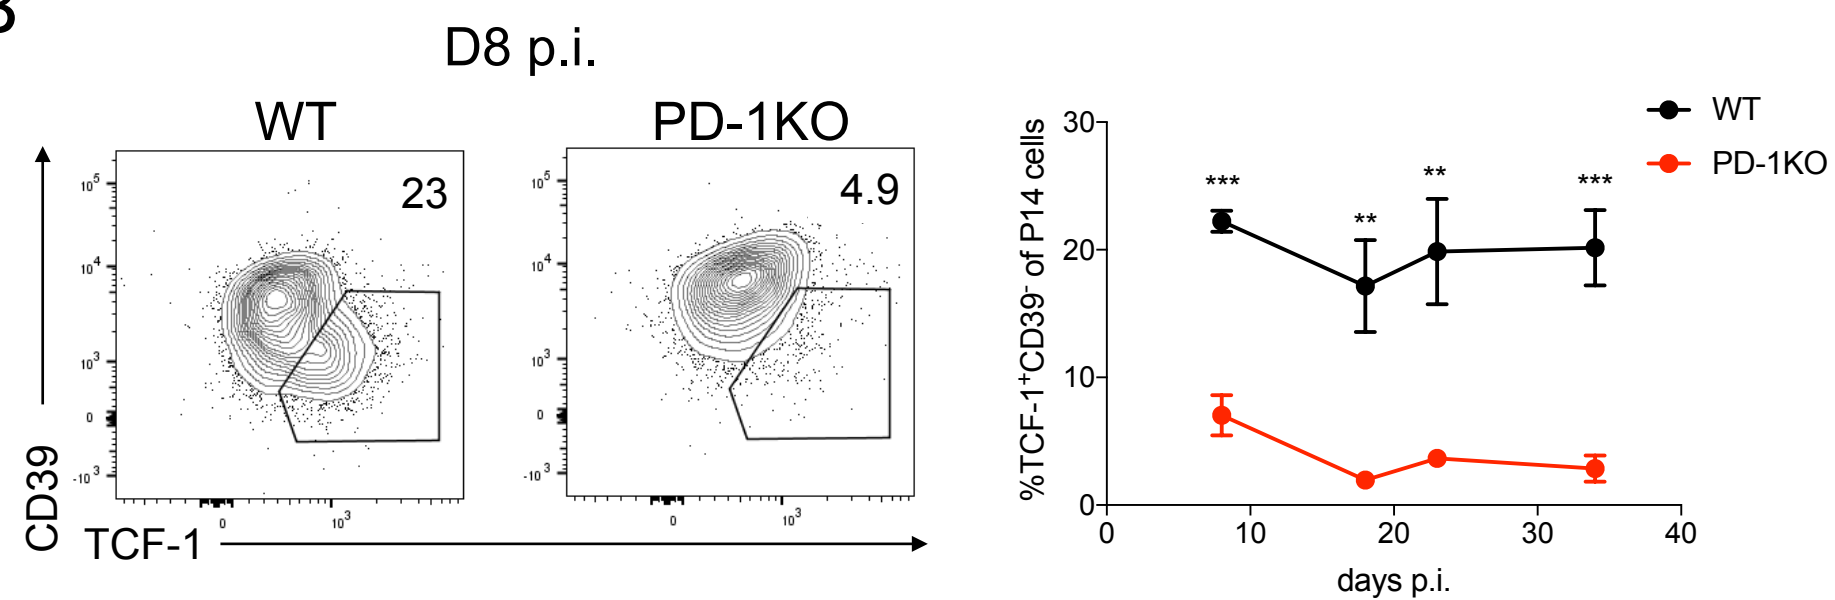

**Figure S6. PD-1 sustains the TCF-1<sup>+</sup> Tex cell precursor pool during chronic infection.**

A. Experimental Design.  $5 \times 10^2$  CD45.2<sup>+</sup> WT P14 or  $5 \times 10^2$  CD45.2<sup>+</sup> PD-1KO P14 CD8 T cells were adoptively transferred into separate CD45.1<sup>+</sup> naive recipient mice and these recipients were treated with GK1.5 followed by infection with CI13.

B. Flow cytometry plots to detect TCF-1<sup>+</sup>CD39<sup>-</sup> P14 cells on D8 p.i. Summary analysis for the percent of donor TCF-1<sup>+</sup>CD39<sup>-</sup> P14 cells present in the spleen on D8, D17, D22, D34 p.i. with CI13 is shown.

\* $P < 0.05$ , \*\* $P < 0.01$ , \*\*\* $P < 0.001$  versus control (two-tailed Student's *t*-test). Data represents 2 independent experiments (mean  $\pm$  s.e.m.) with at least 3 mice/group.

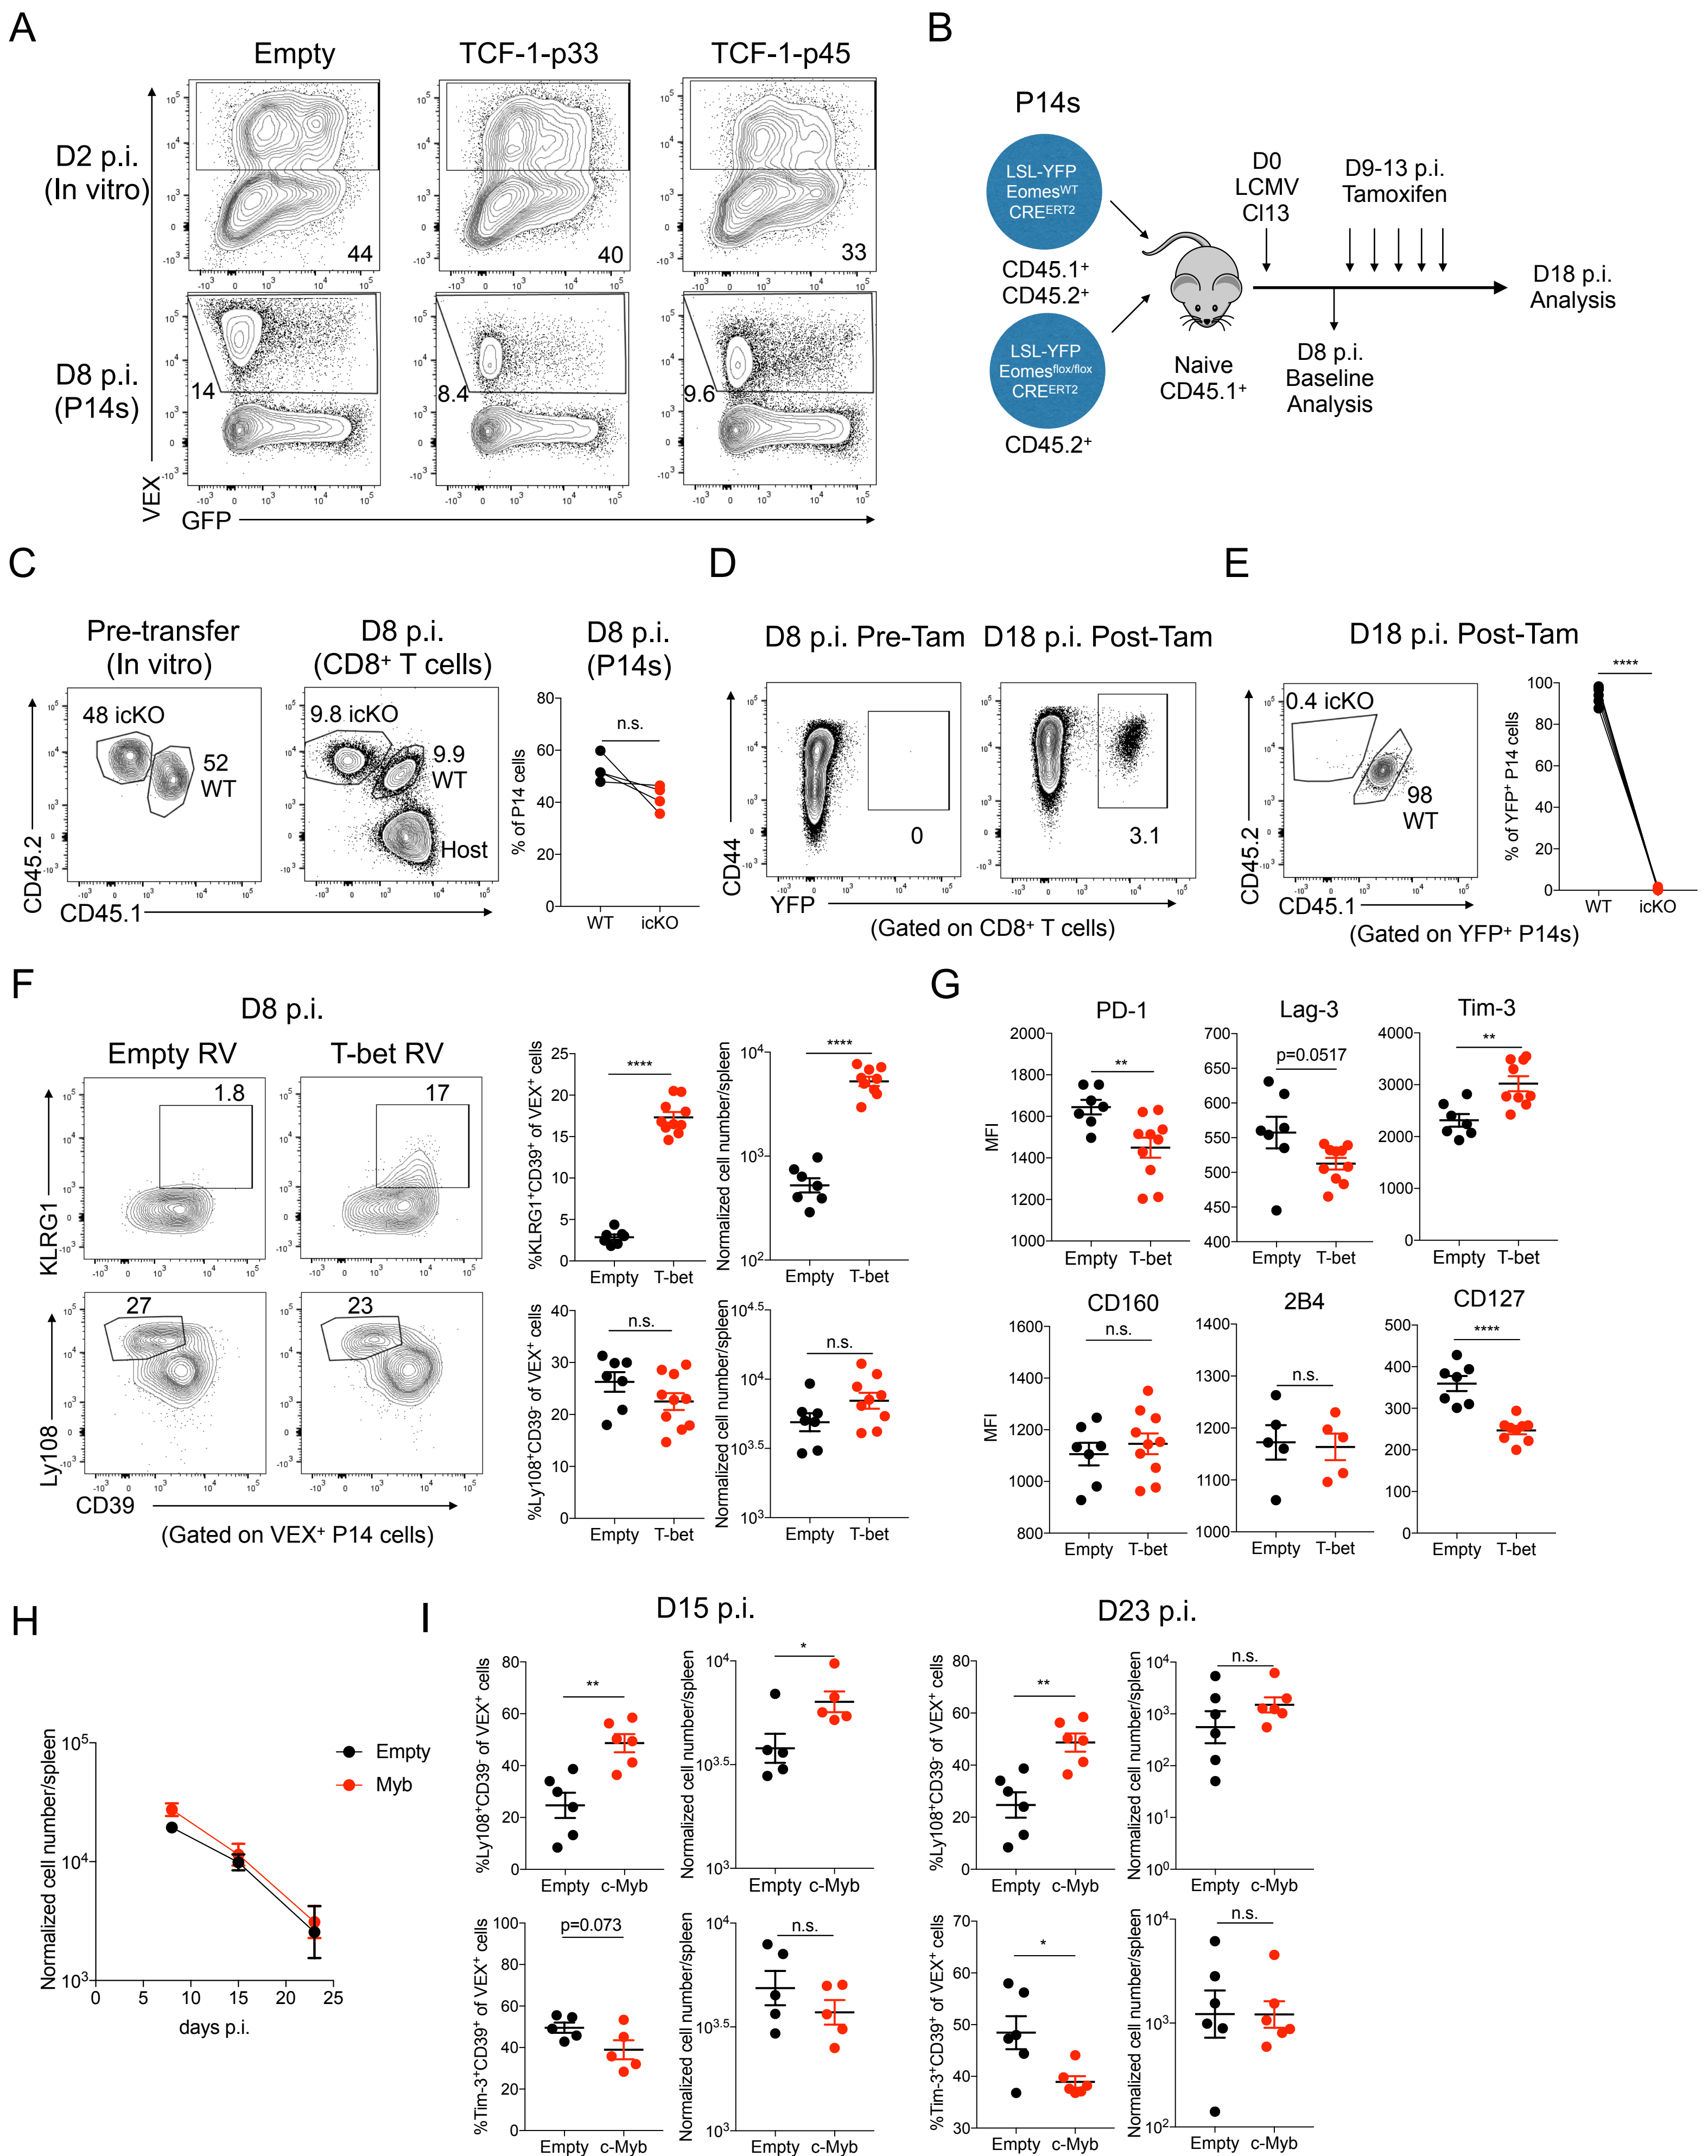

Figure S7, Related to Figure 7(Legend Next Page)



**Figure S7. Effect of TCF-1-related TFs during Tex development.**

- A. Transduction of *Eomes*<sup>GFP</sup> P14 cells with empty, TCF-1-p33, or TCF-1-p45 expressing RVs. Representative flow cytometry plots of P14 cells indicating transduction efficiency on D2 following transduction and on D8 p.i. with Cl13.
- B. Experimental design.  $2 \times 10^3$  CD45.2<sup>+</sup> $\times$ Rosa<sup>LSL-YFP</sup> $\times$ *Eomes*<sup>flox/flox</sup> $\times$ CRE<sup>ERT2</sup> P14 cells and  $2 \times 10^3$  CD45.1<sup>+</sup>CD45.2<sup>+</sup> $\times$  Rosa<sup>LSL-YFP</sup> $\times$ *Eomes*<sup>WT</sup> $\times$ CRE<sup>ERT2</sup> control P14 cells were co-transferred into naive CD45.1<sup>+</sup> recipients and these recipient mice infected with Cl13. These recipient mice were then treated with tamoxifen from D9 p.i. to D13 p.i. At D18 p.i. donor YFP<sup>+</sup> (i.e. indicating CRE activity) P14 cells were analyzed.
- C. Flow cytometry plots and quantification of pre-transfer P14 cell mix and D8 p.i. before tamoxifen treatment. Samples at D8 p.i. were collected from spleen.
- D. Flow cytometry plots of pre (D8 p.i.) and post (D18 p.i.) tamoxifen treatment. Gated on CD8 T cells.
- E. Flow cytometry plots and quantification of YFP<sup>+</sup> P14 cells after tamoxifen treatment (D18 p.i.).
- F. Flow cytometry plots and quantification of KLRG1<sup>+</sup>CD39<sup>+</sup> and Ly108<sup>+</sup>CD39<sup>-</sup> subsets of responding P14 cells transduced with empty versus T-bet expressing RVs. Plots are gated on transduced (VEX<sup>+</sup>) donor P14 cells on D8 p.i. with Cl13. Note: Empty controls are the same controls as Figure 7J.
- G. Expression of PD-1, Lag-3, Tim-3, CD160, 2B4 and CD127 in the P14 cells transduced with empty versus T-bet RVs on D8 p.i. with Cl13.
- H. Number of donor P14 cells transduced with empty versus c-Myb expressing RV at the indicated time points. VEX<sup>+</sup> cell numbers were normalized to  $1 \times 10^4$  VEX<sup>+</sup>P14 cell engraftment according to the transduction efficiency on D2 p.i. and analyzed at D8, D15 and D23 Cl13 p.i.
- I. Quantification of Ly108<sup>+</sup>CD39<sup>-</sup> and Tim-3<sup>+</sup>CD39<sup>+</sup> subsets of responding P14 cells transduced with empty versus c-Myb RVs. Plots are gated on transduced (VEX<sup>+</sup>) donor P14 cells on D15 and D23 p.i. with Cl13. VEX<sup>+</sup> cell numbers were normalized to  $1 \times 10^4$  VEX<sup>+</sup> P14 cell engraftment according to the transduction efficiency on D2 p.i.
- \* $P < 0.05$ , \*\* $P < 0.01$ , \*\*\* $P < 0.001$ , \*\*\*\* $P < 0.001$  versus control (two-tailed Student's *t*-test and One-Way Anova analysis). Data are representative of 2 independent experiments (mean $\pm$ s.e.m.) with at least 3 mice/group.
